# Supplementary material for: Dynamic and Seasonal Distribution of Enteric Viruses in Surface and Well Water in Riyadh (Saudi Arabia)
Source: MDPI journal article supplement (doi:10.3390/pathogens12121405), 2023-11-29
Supplement: s1 [file s1]

---

## Supplementary Materials

**Table S1.** Average surface water temperature at the time of sample collection.

| Month     | Average T (S1-S7) °C |
|-----------|----------------------|
| December  | 23.9                 |
| January   | 21.2                 |
| February  | 24.5                 |
| March     | 25.0                 |
| April     | 27.0                 |
| May       | 29.5                 |
| June      | 29.5                 |
| July      | 30.2                 |
| August    | 31.0                 |
| September | 30.0                 |
| October   | 29.1                 |
| November  | 25.0                 |

---
